# Supplementary material for: The Transmission Patterns of the Endosymbiont Wolbachia within the Hawaiian Drosophilidae Adaptive Radiation
Source: MDPI journal article supplement (doi:10.3390/genes14081545), 2023-07-27
Supplement: s1 [file s1]

**Appendix S2.** A list of *Wolbachia* host species and sequence accessions for five *Wolbachia* Multiple Locus Strain Typing sequences [cytochrome C oxidase subunit A (*coxA*), conserved hypothetical protein (*hcpA*), fructose-bisphosphate adolase (*fbpA*), cell division protein (*ftsZ*) and aspartyl/glutamyl-tRNA aminotransferase subunit B (*gatB*)], and *Wolbachia* surface protein [*wsp* and paralog *wspB*] used for BLASTn queries as part of primer re-design efforts. The sequences were downloaded from the National Center of Biotechnology Information (NCBI) GenBank repository.

| <i>coxA</i>                           |                     | <i>fbpA</i>                |                                  | <i>hcpA</i>                           |                                  | <i>ftsZ</i>                           |                                  | <i>gatB</i>                                 |                                  |
|---------------------------------------|---------------------|----------------------------|----------------------------------|---------------------------------------|----------------------------------|---------------------------------------|----------------------------------|---------------------------------------------|----------------------------------|
| <i>Wolbachia</i><br>Host              | Accession<br>Number | <i>Wolbachia</i><br>Host   | Sample or<br>Accession<br>Number | <i>Wolbachia</i><br>Host              | Sample or<br>Accession<br>Number | <i>Wolbachia</i><br>Host              | Sample or<br>Accession<br>Number | <i>Wolbachia</i><br>Host                    | Sample or<br>Accession<br>Number |
| <i>D. nr.</i><br><i>basimacula</i> #5 | 5 (this<br>study)   | <i>D. pandora</i><br>(MK)  | KU686371.1                       | <i>D. nr.</i><br><i>basimacula</i> #5 | 5 (this study)                   | <i>D. nr.</i><br><i>basimacula</i> #5 | 5 (this<br>study)                | <i>D. nr.</i><br><i>basimacula</i><br>#5    | 5 (this study)                   |
| <i>S. calignosa</i>                   | 20 (this<br>study)  | <i>D. pandora</i><br>(wRi) | KU686365.1                       | <i>D. nr.</i><br><i>basimacula</i> #1 | 59 (this<br>study)               | <i>D. simulans</i><br>(wNo)           | DQ266426<br>.1                   | <i>S. calignosa</i>                         | 20 (this<br>study)               |
| <i>D. nr.</i><br><i>basimacula</i> #2 | 41 (this<br>study)  | <i>D. suzukii</i>          | KS308223.1                       | <i>D. prolactica</i>                  | 123 (this<br>study)              | <i>D. innubila</i> B                  | DQ266424<br>.1                   | <i>D.</i><br><i>prolactica</i>              | 123 (this<br>study)              |
| <i>D. nr.</i><br><i>basimacula</i> #1 | 59 (this<br>study)  |                            |                                  | <i>D. micromyia</i>                   | 155 (this<br>study)              | <i>D. simulans</i><br>(Riverside)     | EF423735.<br>1                   | <i>D.</i><br><i>micromyia</i>               | 155 (this<br>study)              |
| <i>D. prolactica</i>                  | 123 (this<br>study) |                            |                                  | <i>D. prostopalpis</i>                | 175 (this<br>study)              | <i>D. simulans</i><br>(Irvine 8)      | EF423733.<br>1                   | <i>D.</i><br><i>prostopalpis</i>            | 175 (this<br>study)              |
| <i>D. kikiko</i>                      | 127 (this<br>study) |                            |                                  | <i>D. ancyla</i>                      | 185 (this<br>study)              | <i>D. pandora</i><br>(wRi)            | KU686366.<br>1                   | <i>D. ancyla</i>                            | 185 (this<br>study)              |
| <i>D.</i><br><i>prostopalpis</i>      | 175 (this<br>study) |                            |                                  | <i>D. nr.</i><br><i>basimacula</i> #1 | 212 (this<br>study)              |                                       |                                  | <i>D. nr.</i><br><i>basimacula</i><br>#1    | 212 (this<br>study)              |
| <i>D. ancyla</i>                      | 185 (this<br>study) |                            |                                  | <i>D. pandora</i><br>(MK)             | KU686374.1                       |                                       |                                  | <i>D. suzukii</i>                           | KF943819.1                       |
| <i>D.</i><br><i>atroscutellata</i>    | 187 (this<br>study) |                            |                                  | <i>D. pandora</i><br>(wRi)            | KU686368.1                       |                                       |                                  | <i>D. borealis</i>                          | FJ415471.1                       |
| <i>D. prolactica</i>                  | 197 (this<br>study) |                            |                                  | <i>D. suzukii</i>                     | KF943818.1                       |                                       |                                  | <i>D.</i><br><i>melanogaste</i><br><i>r</i> | DQ842452.1                       |
| <i>D. nr.</i><br><i>basimacula</i> #1 | 212 (this<br>study) |                            |                                  | <i>D. orientacea</i>                  | EU126285.1                       |                                       |                                  | <i>D. simulans</i>                          | DQ842435.1                       |

|                             |                  |  |  |                            |            |  |  |                      |            |
|-----------------------------|------------------|--|--|----------------------------|------------|--|--|----------------------|------------|
| <i>D. nr. basimacula</i> #2 | 213 (this study) |  |  | <i>D. munda</i>            | EU126281.1 |  |  | <i>D. simulans</i>   | DQ842434.1 |
| <i>D. seclusa</i>           | 221 (this study) |  |  | <i>D. testacea</i>         | EU126277.1 |  |  | <i>D. simulans</i>   | DQ842433.1 |
| <i>D. nigrocirrus</i>       | 244 (this study) |  |  | <i>D. innubila</i>         | EU126276.1 |  |  | <i>D. simulans</i>   | DQ842432.1 |
| <i>D. recens</i>            | DQ842283.1       |  |  | <i>D. neotestacea</i>      | EU126271.1 |  |  | <i>D. recens</i>     | DQ842431.1 |
| <i>D. orientacea</i>        | DQ842282.1       |  |  | <i>D. recens isolate 9</i> | DQ842394.1 |  |  | <i>D. orientacea</i> | DQ842430.1 |

| <i>coxA</i>                       |                  | <i>fbpA</i>           |                  | <i>hcpA</i>                       |                  | <i>ftsZ</i>           |                  | <i>gatB</i>           |                  |
|-----------------------------------|------------------|-----------------------|------------------|-----------------------------------|------------------|-----------------------|------------------|-----------------------|------------------|
| <i>Wolbachia Host</i>             | Accession Number | <i>Wolbachia Host</i> | Accession Number | <i>Wolbachia Host</i>             | Accession Number | <i>Wolbachia Host</i> | Accession Number | <i>Wolbachia Host</i> | Accession Number |
| <i>D. neotestacea</i>             | DQ842281.1       |                       |                  | <i>D. simulans isolate 26</i>     | DQ842397.1       |                       |                  | <i>D. neotestacea</i> | DQ842429.1       |
|                                   |                  |                       |                  |                                   |                  |                       |                  |                       |                  |
| <i>D. bifasciata</i>              | DQ842279.1       |                       |                  | <i>D. melanogaster isolate 1</i>  | DQ842415.1       |                       |                  | <i>D. innubila</i>    | DQ842428.1       |
| <i>D. innubila</i>                | DQ842280.1       |                       |                  | <i>D. bifasciata isolate 5</i>    | DQ842390.1       |                       |                  | <i>D. bifasciata</i>  | DQ842427.1       |
| <i>D. simulans</i>                | DQ842284.1       |                       |                  | <i>D. pseudotakahashii (wPse)</i> | MF348260.1       |                       |                  | <i>D. simulans</i>    | KF717543.1       |
| <i>D. pseudotakahashii (wPse)</i> | MF348256.1       |                       |                  |                                   |                  |                       |                  | <i>D. simulans</i>    | KF717542.1       |
| <i>D. pandora (wRi)</i>           | KU686364.1       |                       |                  |                                   |                  |                       |                  | <i>D. simulans</i>    | KF717541.1       |
| <i>D. pandora (MK)</i>            | KU686370.1       |                       |                  |                                   |                  |                       |                  | <i>D. orientacea</i>  | EU126171.1       |
| <i>D. testacea</i>                | EU126220.1       |                       |                  |                                   |                  |                       |                  | <i>D. munda</i>       | EU126167.1       |
|                                   |                  |                       |                  |                                   |                  |                       |                  | <i>D. testacea</i>    | EU126163.1       |
|                                   |                  |                       |                  |                                   |                  |                       |                  | <i>D. innubila</i>    | EU126162.1       |
|                                   |                  |                       |                  |                                   |                  |                       |                  | <i>D. neotestacea</i> | EU126157.1       |

|  |  |  |  |  |  |  |  |                            |            |
|--|--|--|--|--|--|--|--|----------------------------|------------|
|  |  |  |  |  |  |  |  | <i>D. pandora</i><br>(MK)  | KU686373.1 |
|  |  |  |  |  |  |  |  | <i>D. pandora</i><br>(wRi) | KU686367.1 |
|  |  |  |  |  |  |  |  | <i>D. simulans</i>         | KU255378.1 |
|  |  |  |  |  |  |  |  | <i>D. simulans</i>         | KF717571.1 |
|  |  |  |  |  |  |  |  | <i>D. simulans</i>         | KF717570.1 |

| <i>wspB</i>                 |                            | <i>wsp</i>                        |                            |                                     |                            |                                     |                            |                          |                            |
|-----------------------------|----------------------------|-----------------------------------|----------------------------|-------------------------------------|----------------------------|-------------------------------------|----------------------------|--------------------------|----------------------------|
| Wolbachia Host              | Sample or Accession Number | Wolbachia Host                    | Sample or Accession Number | Wolbachia Host                      | Sample or Accession Number | Wolbachia Host                      | Sample or Accession Number | Wolbachia Host           | Sample or Accession Number |
| <i>D. nr. basimacula</i> #5 | 5 (this study)             | <i>D. pseudoananassae (wPana)</i> | DQ412108.1                 | <i>D. orientacea</i>                | DQ842466.1                 | <i>D. septentrionsaltans (wSpt)</i> | AY620211.1                 | <i>D. ananassae</i>      | AY858801.1                 |
| <i>D. large spots</i>       | 16 (this study)            | <i>D. mauritiana (wNo)</i>        | DQ412107.1                 | <i>D. innubila</i>                  | AY552553.1                 | <i>D. melanogaster</i>              | KU870673.1                 | <i>D. pandora (wRi)</i>  | KU686369.1                 |
| <i>D. simulans</i>          | AJ580923.1                 | <i>D. simulans</i>                | DQ842470.1                 | <i>D. innubila</i>                  | DQ842464.1                 | <i>D. melanogaster (wMel)</i>       | DQ412100.1                 | <i>D. suzukii (72w)</i>  | JX134954.1                 |
| <i>D. simulans (wRi)</i>    | EU095939.1                 | <i>D. simulans</i>                | DQ842469.1                 | <i>D. borealis</i>                  | FJ415468.1                 | <i>D. simulans (wMel)</i>           | DQ412101.1                 | <i>D. suzukii (71w)</i>  | JX134953.1                 |
|                             |                            | <i>D. kikkawai</i>                | JX134922.1                 | <i>D. munda</i>                     | EU126452.1                 | <i>D. melanogaster</i>              | JF505383.1                 | <i>D. suzukii (70w)</i>  | JX134952.1                 |
|                             |                            | <i>D. apicipuncta</i>             | JX134926.1                 | <i>D. pandora (MK)</i>              | KU686375.1                 | <i>D. melanogaster</i>              | LC108849.1                 | <i>D. paulistorum</i>    | GQ924887.1                 |
|                             |                            | <i>D. innubila</i>                | AY552552.1                 | <i>D. recens</i>                    | AY154399.1                 | <i>D. melanogaster</i>              | DQ842486.1                 | <i>D. simulans</i>       | DQ842468.1                 |
|                             |                            | <i>D. Dorsigera</i>               | JX134935.1                 | <i>D. recens</i>                    | DQ842467.1                 | <i>D. melanogaster</i>              | AY888036.1                 | <i>D. baimaii (wBai)</i> | DQ412091.1                 |
|                             |                            | <i>D. forficata</i>               | JX134928.1                 | <i>D. melanogaster</i>              | AY888034.1                 | <i>D. paulistorum (wMel-like)</i>   | KF289042.1                 | <i>D. rellima</i>        | HM436813.1                 |
|                             |                            | <i>D. tetraspilota</i>            | JX134936.1                 | <i>D. septentrionsaltans</i>        | AY620214.1                 | <i>D. equinoxialis (wMel-like)</i>  | KF289041.1                 |                          |                            |
|                             |                            | <i>D. innubila</i>                | EU126447.1                 | <i>D. ambigua strain</i>            | AY567540.1                 | <i>D. melanogaster</i>              | AY888035.1                 |                          |                            |
|                             |                            | <i>D. basimacula</i>              | JX134934.1                 | <i>D. tristis (wTri)</i>            | AY567541.1                 | <i>D. neotestacea</i>               | GU552301.1                 |                          |                            |
|                             |                            | <i>D. basimacula</i>              | JX134933.1                 | <i>D. septentrionsaltans (wSpt)</i> | AY620213.1                 | <i>D. takahashii (wTak)</i>         | DQ412094.1                 |                          |                            |
|                             |                            | <i>D. eurypeza strain</i>         | JX134927.1                 | <i>D. septentrionsaltans (wSpt)</i> | AY620212.1                 | <i>D. pseudotakahashii (wPse)</i>   | DQ412093.1                 |                          |                            |
|                             |                            | <i>D. fundita</i>                 | JX134924.1                 | <i>D. septentrionsaltans (wSpt)</i> | AY620210.1                 | <i>D. bifasciata</i>                | DQ842463.1                 |                          |                            |

|                |                            | <i>D. fundita</i>     | JX134929.1                 | <i>D. prosaltans</i><br>(wPro) | AY620208.1                 | <i>D. simulans</i><br>(Riverside) | EF423761.1       |                |                            |
|----------------|----------------------------|-----------------------|----------------------------|--------------------------------|----------------------------|-----------------------------------|------------------|----------------|----------------------------|
| <i>wspB</i>    |                            | <i>wsp</i>            |                            |                                |                            |                                   |                  |                |                            |
| Wolbachia Host | Sample or Accession Number | Wolbachia Host        | Sample or Accession Number | Wolbachia Host                 | Sample or Accession Number | Wolbachia Host                    | Accession Number | Wolbachia Host | Sample or Accession Number |
|                |                            | <i>D. ancylo</i>      | JX134925.1                 | <i>D. arawakana</i><br>(wWil)  | DQ412099.1                 | <i>D. simulans</i><br>(Irvine 46) | EF423760.1       |                |                            |
|                |                            | <i>D. dasyncnemia</i> | JX134915.1                 | <i>D. tropicalis</i><br>(wWil) | DQ412098.1                 | <i>D. simulans</i><br>(Irvine 45) | EF423759.1       |                |                            |
|                |                            | <i>D. dasyncnemia</i> | JX134920.1                 | <i>D. willistoni</i><br>(wWil) | DQ412097.1                 | <i>D. simulans</i><br>(Irvine 43) | EF423758.1       |                |                            |
|                |                            | <i>D. dasyncnemia</i> | JX134912.1                 | <i>D. tropicalis</i><br>(wAu)  | KF289039.1                 | <i>D. simulans</i><br>(Irvine 42) | EF423757.1       |                |                            |
|                |                            | <i>D. dasyncnemia</i> | JX134921.1                 | <i>D. willistoni</i><br>(wWil) | AY620229.1                 | <i>D. simulans</i><br>(Irvine 40) | EF423756.1       |                |                            |
|                |                            | <i>D. redunca</i>     | JX134932.1                 | <i>D. willistoni</i><br>(wWil) | AY620228.1                 | <i>D. simulans</i><br>(Irvine 36) | EF423755.1       |                |                            |
|                |                            | <i>D. prodita</i>     | JX134931.1                 | <i>D. willistoni</i><br>(wWil) | AY620227.1                 | <i>D. simulans</i><br>(Irvine 34) | EF423754.1       |                |                            |
|                |                            | <i>D. dasyncnemia</i> | JX134919.1                 | <i>D. willistoni</i><br>(wWil) | AY620226.1                 | <i>D. simulans</i><br>(Irvine 33) | EF423753.1       |                |                            |
|                |                            | <i>D. dasyncnemia</i> | JX134918.1                 | <i>D. willistoni</i><br>(wWil) | AY620225.1                 | <i>D. simulans</i><br>(Irvine 32) | EF423752.1       |                |                            |
|                |                            | <i>D. dasyncnemia</i> | JX134917.1                 | <i>D. willistoni</i><br>(wLag) | AY620224.1                 | <i>D. simulans</i><br>(Irvine 29) | EF423751.1       |                |                            |
|                |                            | <i>D. dasyncnemia</i> | JX134916.1                 | <i>D. willistoni</i><br>(wWil) | AY620223.1                 | <i>D. simulans</i><br>(Irvine 28) | EF423750.1       |                |                            |
|                |                            | <i>D. dasyncnemia</i> | JX134914.1                 | <i>D. willistoni</i><br>(wWil) | AY620222.1                 | <i>D. simulans</i><br>(Irvine 27) | EF423749.1       |                |                            |
|                |                            | <i>D. dasyncnemia</i> | JX134913.1                 | <i>D. willistoni</i><br>(wWil) | AY620221.1                 | <i>D. simulans</i><br>(Irvine 25) | EF423748.1       |                |                            |
|                |                            | <i>D. dasyncnemia</i> | JX134911.1                 | <i>D. willistoni</i><br>(wWil) | AY620220.1                 | <i>D. simulans</i><br>(Irvine 24) | EF423747.1       |                |                            |
|                |                            | <i>D. dasyncnemia</i> | JX134910.1                 | <i>D. willistoni</i><br>(wWil) | AY620219.1                 | <i>D. simulans</i><br>(Irvine 23) | EF423746.1       |                |                            |

|  |  |                                  |            |                                                  |            |                                   |            |  |  |
|--|--|----------------------------------|------------|--------------------------------------------------|------------|-----------------------------------|------------|--|--|
|  |  | <i>D. nigrocirrus</i>            | JX134930.1 | <i>D. willistoni</i><br>(wWil)                   | AY620218.1 | <i>D. simulans</i><br>(Irvine 21) | EF423745.1 |  |  |
|  |  | <i>D. nikananu</i><br>(wNik)     | DQ412109.1 | <i>D. paulistorum</i>                            | GQ924890.1 | <i>D. simulans</i><br>(Irvine 19) | EF423744.1 |  |  |
|  |  | <i>D. sturtevanti</i><br>(wStv)  | AY620217.1 | <i>D. paulistorum</i>                            | GQ924889.1 | <i>D. simulans</i><br>(Irvine 13) | EF423743.1 |  |  |
|  |  | <i>D. sturtevanti</i><br>(wStv ) | AY620216.1 | <i>D. yakuba</i>                                 | AY291346.1 | <i>D. simulans</i><br>(Irvine 12) | EF423742.1 |  |  |
|  |  | <i>D. sturtevanti</i><br>(wStv)  | DQ412110.1 | <i>D. teissieri</i>                              | AY291347.1 | <i>D. simulans</i><br>(Irvine 11) | EF423741.1 |  |  |
|  |  | <i>D. sturtevanti</i><br>(wStv)  | AY620215.1 | <i>D. yakuba</i>                                 | AY291348.1 | <i>D. simulans</i><br>(Irvine 10) | EF423740.1 |  |  |
|  |  | <i>D. sechellia</i> (wHa)        | DQ412111.1 | <i>D. paulistorum</i>                            | GQ924888.1 | <i>D. simulans</i><br>(Irvine 8)  | EF423739.1 |  |  |
|  |  | <i>D. fumipennis</i><br>(wFum1)  | AY620207.1 | <i>D.</i><br><i>septentrionsaltans</i><br>(wSpt) | AY620209.1 | <i>D. simulans</i><br>(Irvine 5)  | EF423738.1 |  |  |
|  |  | <i>D. bicornuta</i><br>(wBic)    | DQ412092.1 | <i>D. paulistorum</i><br>(wAu-lik)               | KF289040.1 | <i>D. simulans</i><br>(Irvine 2)  | EF423737.1 |  |  |
|  |  | <i>D. neotestacea</i>            | DQ842465.1 | <i>D. arawakana</i><br>(wSpt)                    | DQ412102.1 | <i>D. simulans</i><br>(Irvine 1)  | EF423736.1 |  |  |
|  |  | <i>D. neotestacea</i>            | EU126442.1 | <i>D. ananassae</i><br>(wSpt)                    | DQ412103.1 | <i>D. quadraria</i><br>(wRi)      | DQ412096.1 |  |  |
|  |  | <i>D. orientacea</i>             | EU126456.1 | <i>D. teissieri</i> (wSpt)                       | DQ412104.1 | <i>D. ananassae</i><br>(wRi)      | DQ412095.1 |  |  |
|  |  | <i>D. testacea</i>               | EU126448.1 | <i>D. prosaltans</i>                             | DQ118779.1 | <i>D. ananassae</i>               | JQ518485.1 |  |  |
