# Supplementary material for: The Transmission Patterns of the Endosymbiont Wolbachia within the Hawaiian Drosophilidae Adaptive Radiation
Source: MDPI journal article supplement (doi:10.3390/genes14081545), 2023-07-27
Supplement: s1 [file s1]

**Supplementary Table S3.** Record of Akaike information criterion (AIC) values obtained using the fitMK function in phytools v0.6-44 (Revell 2012) package in R to determine the best rates model to apply to each data set for stochastic character mapping analyses.

| Models                          | Island of Collection                       |                                                         | Ovipositional Substrate                    |                                                         | Host Plant Family                          |                                                         |
|---------------------------------|--------------------------------------------|---------------------------------------------------------|--------------------------------------------|---------------------------------------------------------|--------------------------------------------|---------------------------------------------------------|
|                                 | <i>Wolbachia</i> in Hawaiian Drosophilidae | <i>Wolbachia</i> in Hawaiian Drosophilidae + mosquitoes | <i>Wolbachia</i> in Hawaiian Drosophilidae | <i>Wolbachia</i> in Hawaiian Drosophilidae + mosquitoes | <i>Wolbachia</i> in Hawaiian Drosophilidae | <i>Wolbachia</i> in Hawaiian Drosophilidae + mosquitoes |
| Even Rates Model (ER)           | 37.13527                                   | 41.55004                                                | 48.46443                                   | 53.6505                                                 | 64.26912                                   | 72.05277                                                |
| Symmetric Rates Model (SYM)     | 38.86977                                   | 43.77209                                                | 51.76297                                   | 57.1812                                                 | 93.887                                     | 101.5524                                                |
| All Rates Different Model (ARD) | 44.94778                                   | 48.04271                                                | 59.44507                                   | 64.83332                                                | 136.63868                                  | 144.75148                                               |

#### References

Revell, L.J. Phytools: An R package for phylogenetic comparative biology (and other things). *Methods Ecol. Evol.* **2012**, 3, 217–223.
