# Supplementary material for: The Transmission Patterns of the Endosymbiont Wolbachia within the Hawaiian Drosophilidae Adaptive Radiation
Source: MDPI journal article supplement (doi:10.3390/genes14081545), 2023-07-27
Supplement: s1 [file s1]

**Supplementary Table S1.** National Center for Biotechnology Information (NCBI) accession numbers for Hawaiian Drosophilidae gene sequences selected for phylogenetic reconstruction of individual species having a verified *Wolbachia* infection, and genome accessions for outgroup taxa (also infected). Gene names and abbreviations are elongation factor 1-gamma (*EF1g*), glycerol-3-phosphate dehydrogenase (*Gpdh*), phosphoglucose isomerase (*Pgi*), and yolk protein 2 (*Yp2*).

| Sample ID | Species Name                     | Accession Number (NCBI) |            |             |            |            | Reference |
|-----------|----------------------------------|-------------------------|------------|-------------|------------|------------|-----------|
|           |                                  | <i>EF1g</i>             | <i>Fz4</i> | <i>Gpdh</i> | <i>Pgi</i> | <i>Yp2</i> |           |
| M09120    | <i>Scaptomyza cyrtandrae</i>     | JN815467.1              | JN815636.1 | JN815794.1  | JN815958.1 | JN816160.1 | [1]       |
| M09124    | <i>Scaptomyza crassifemur</i>    | JN815471.1              | -----      | JN815798.1  | JN815962.1 | JN816164.1 | [1]       |
| M09127    | <i>Scaptomyza reducta</i>        | JN815474.1              | -----      | JN815801.1  | JN815965.1 | JN816167.1 | [1]       |
| M09245    | <i>Scaptomyza caliginosa</i>     | JN815560.1              | JN815714.1 | JN815878.1  | JN816041.1 | JN816245.1 | [1]       |
| M09011    | <i>Scaptomyza nasalis</i>        | JN815359.1              | JN815639.1 | JN815722.1  | JN815886.1 | JN816052.1 | [1]       |
| M09015    | <i>Scaptomyza undulata</i>       | JN815363.1              | JN815568.1 | JN815724.1  | JN815888.1 | JN816056.1 | [1]       |
| M09066    | <i>Drosophila perissopoda</i>    | JN815413.1              | JN815594.1 | JN815751.1  | JN815915.1 | JN816106.1 | [1]       |
| M09028    | <i>Drosophila quasiexpansa</i>   | JN815376.1              | JN815632.1 | JN815790.1  | JN815954.1 | JN816153.1 | [1]       |
| M09075    | <i>Drosophila atroscutellata</i> | JN815422.1              | JN815603.1 | JN815760.1  | JN815924.1 | JN816115.1 | [1]       |
| M09073    | <i>Drosophila ancyla</i>         | JN815420.1              | JN815601.1 | JN815758.1  | JN815922.1 | JN816113.1 | [1]       |
| M09228    | <i>Drosophila nigrocirrus</i>    | -----                   | JN815701.1 | JN815864.1  | -----      | JN816230.1 | [1]       |
| M09230    | <i>Drosophila</i> "large spots"  | JN815548.1              | JN815703.1 | JN815866.1  | JN816029.1 | JN816232.1 | [1]       |
| M09095    | <i>Drosophila kikiko</i>         | JN815442.1              | JN815621.1 | JN815779.1  | JN815943.1 | JN816135.1 | [1]       |
| M09037    | <i>Drosophila hawaiiensis</i>    | JN815385.1              | JN815573.1 | JN815730.1  | JN815894.1 | JN816077.1 | [1]       |
| M09043    | <i>Drosophila micromyia</i>      | JN815390.1              | JN815577.1 | JN815734.1  | JN815898.1 | JN816083.1 | [1]       |
| M09096    | <i>Drosophila engyochracea</i>   | JN815443.1              | JN815622.1 | JN815780.1  | JN815944.1 | JN816136.1 | [1]       |

| Sample ID | Species Name                   | Accession Number (NCBI) |                |                |                |                | Citation |
|-----------|--------------------------------|-------------------------|----------------|----------------|----------------|----------------|----------|
|           |                                | <i>EF1g</i>             | <i>Fz4</i>     | <i>Gpdh</i>    | <i>Pgi</i>     | <i>Yp2</i>     |          |
| M09059    | <i>Drosophila murphyi</i>      | JN815406.1              | JN815588.1     | JN815745.1     | JN815909.1     | JN816080.1     | [1]      |
| M09061    | <i>Drosophila ochracea</i>     | JN815408.1              | JN815590.1     | JN815783.1     | JN815911.1     | JN816101.1     | [1]      |
| M09091    | <i>Drosophila prolaticilia</i> | JN815438.1              | JN815565.1     | JN815719.1     | JN815939.1     | JN816131.1     | [1]      |
| M09063    | <i>Drosophila prostopalpis</i> | JN815410.1              | JN815592.1     | JN815749.1     | JN815913.1     | JN816103.1     | [1]      |
| M09189    | <i>Drosophila heteroneura</i>  | JN815516.1              | JN815675.1     | JN815838.1     | JN816002.1     | JN816205.1     | [1]      |
| M09018    | <i>Drosophila basimacula</i>   | JN815366.1              | -----          | -----          | -----          | JN816059.1     | [1]      |
| M09030    | <i>Drosophila seclusa</i>      | JN815378.1              | -----          | -----          | -----          | JN816071.1     | [1]      |
| M09025    | <i>Drosophila redunca</i>      | JN815373.1              | -----          | -----          | -----          | JN816066.1     | [1]      |
| N/A       | <i>Drosophila suzukii</i>      | CAKG01035181.1          | CAKG01024421.1 | CAKG01004152.1 | CAKG01035649.1 | CAKG01056334.1 | [2]      |
| N/A       | <i>Drosophila melanogaster</i> | NT_033777.3             | NC_004354.4    | NT_033779.5    | NT_033778.4    | NC_004354.4    | [3]      |
| N/A       | <i>Drosophila simulans</i>     | NT_479536.1             | NC_029795.1    | NT_479533.1    | NT_479534.1    | NC_029795.1    | [4]      |
| N/A       | <i>Culex quinquefasciatus</i>  | NW_001887359.1          | -----          | NW_001886703.1 | NW_001886829.1 | -----          | [5]      |
| N/A       | <i>Aedes albopictus</i>        | NW_017857380.1          | -----          | NW_017856043.1 | NW_017857316.1 | -----          | [6]      |

#### References

1. Magnacca, K.N.; Price, D.K. Rapid adaptive radiation and host plant conservation in the Hawaiian picture wing *Drosophila* (Diptera: Drosophilidae). *Mol. Phylogenetics Evol.* **2015**, *92*, 226–242.
2. Ometto, L.; Cestaro, A.; Ramasamy, S.; Grassi, A.; Revadi, S.; Siozios, S.; Moretto, M.; Fontana, P.; Varotto, C.; Pisani, D.; et al. Linking genomics and ecology to investigate the complex evolution of an invasive *Drosophila* pest. *Genome Biol. Evol.* **2013**, *5*, 745–757.
3. dos Santos, G.; Schroeder, A.J.; Goodman, J.L.; Strelets, V.B.; Crosby, M.A.; Thurmond, J.; Emmeret, D.B.; Gelbart, W.M.; FlyBase Consortium. FlyBase: Introduction of the *Drosophila melanogaster* Release 6 reference genome assembly and large-scale migration of genome annotations. *Nucleic Acids Res.* **2015**, *43*, D690–D697.
4. Hu, T.T.; Eisen, M.B.; Thornton, K.R.; Andolfatto, P. A second-generation assembly of the *Drosophila simulans* genome provides new insights into patterns of lineage-specific divergence. *Genome Res.* **2013**, *23*, 89–98.
5. Arensburger, P.; Megy, K.; Waterhouse, R.M.; Abrudan, J.; Amedeo, P.; Antelo, B.; Bartholomay, L.; Bidwell, S.; Caler, E.; et al. Sequencing of *Culex quinquefasciatus* establishes a platform for mosquito comparative genomics. *Science* **2010**, 86–88.
6. Miller, J.R.; Koren, S.; Dilley, K.A.; Puri, V.; Brown, D.M.; Harkins, D.M.; Thibaud-Nissen, F.; Rosen, B.; Chen, X.G.; et al. Analysis of the *Aedes albopictus* C6/36 genome provides insight into cell line utility for viral propagation. *Gigascience* **2018**, *7*, 1–13.
